# Supplementary material for: Ecological Drivers of Species Distributions and Niche Overlap for three Eastern Subterranean Termite Species in the Southern Appalachian Mountains, USA
Source: Preprints.org preprint supplement (doi:10.20944/preprints201812.0178.v1), 2018-12-17
Supplement: Supplementary file 1 [file supplementary]

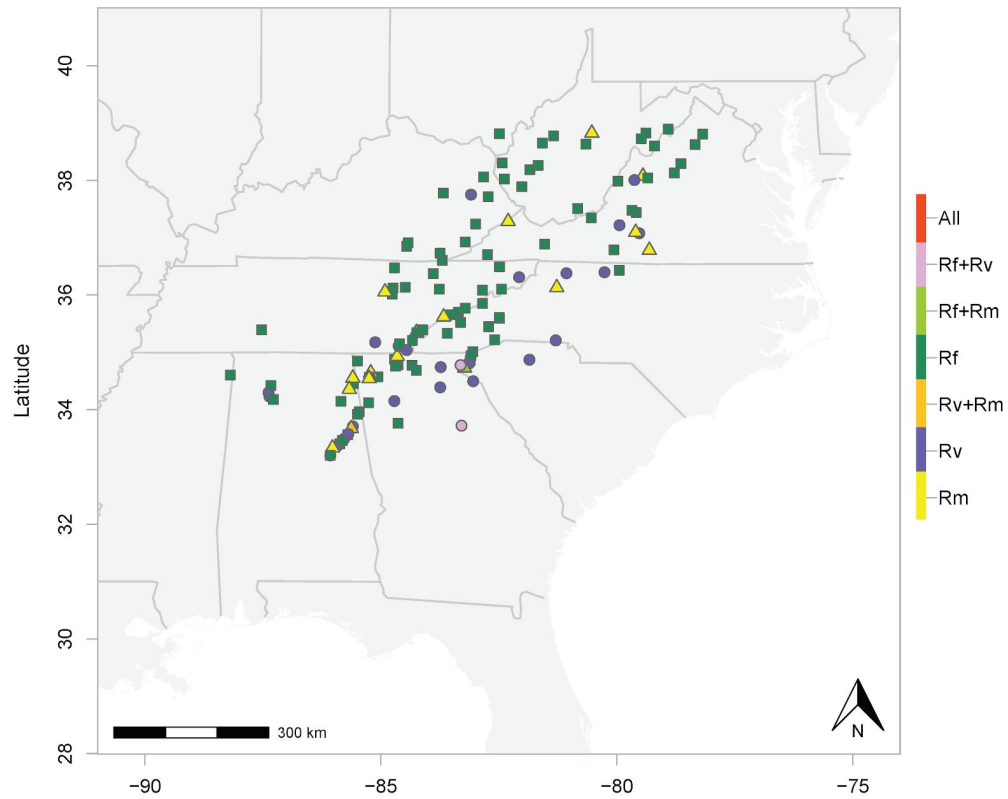

**Figure S1.** Map of *Reticulitermes* sampling depicting occurrences of one or more species at each site. Abbreviations used for *R. flavipes*, *R. mallei*, and *R. virginicus* are Rf, Rm, and Rv, respectively. Sites are color coded based on the number of species detected. There were no sites with all three species ("All"). The sites with two species are shown in the legend as "Rf+Rv," "Rf+Rm," and "Rv+Rm."
