# Supplementary material for: Ecological Drivers of Species Distributions and Niche Overlap for three Eastern Subterranean Termite Species in the Southern Appalachian Mountains, USA
Source: Preprints.org preprint supplement (doi:10.20944/preprints201812.0178.v1), 2018-12-17
Supplement: Supplementary file 2 [file supplementary]

**Table S1.** Sampling sites with number of species occurrences at each site and number of logs per site. Geographic coordinates and altitude (alt.) in meters for each site are reported. *R. flavipes*, *R. mallei*, and *R. virginicus* are abbreviated as Rf, Rm, and Rv, respectively. The number (#) of logs refers the number of logs sampled, from which termites were collected and identified to species (note that site 37 is the only site where two species were detected in the same log). Only non-redundant occurrence records were used for subsequent analyses.

| Site | Longitude | Latitude | Alt. (m) | Rf | Rm | Rv | # of Logs |
|------|-----------|----------|----------|----|----|----|-----------|
| 1    | -84.63805 | 34.77972 | 764      | 1  | 0  | 0  | 1         |
| 2    | -85.06536 | 34.57297 | 450      | 1  | 0  | 0  | 1         |
| 3    | -85.21630 | 34.64336 | 386      | 0  | 1  | 0  | 1         |
| 4    | -85.24268 | 34.56515 | 408      | 1  | 0  | 0  | 1         |
| 5    | -85.24043 | 34.56416 | 427      | 0  | 0  | 1  | 1         |
| 6    | -79.38618 | 38.82374 | 528      | 2  | 0  | 0  | 2         |
| 7    | -79.38506 | 38.82585 | 548      | 1  | 0  | 0  | 1         |
| 8    | -79.48494 | 38.72694 | 936      | 1  | 0  | 0  | 1         |
| 9    | -85.25067 | 34.54107 | 341      | 0  | 2  | 0  | 2         |
| 10   | -86.07185 | 33.20099 | 301      | 0  | 0  | 2  | 2         |
| 11   | -85.80658 | 33.47105 | 621      | 1  | 0  | 1  | 2         |
| 12   | -85.77732 | 33.49199 | 413      | 0  | 0  | 1  | 1         |
| 13   | -85.69289 | 33.57288 | 340      | 0  | 0  | 1  | 1         |
| 14   | -85.59404 | 33.70745 | 360      | 0  | 0  | 1  | 1         |
| 15   | -85.62832 | 33.67281 | 427      | 0  | 1  | 1  | 2         |
| 16   | -85.87318 | 33.40451 | 460      | 2  | 0  | 0  | 2         |
| 17   | -85.93159 | 33.36097 | 440      | 0  | 0  | 1  | 1         |
| 18   | -86.02572 | 33.33344 | 313      | 0  | 1  | 0  | 1         |
| 19   | -87.36352 | 34.23058 | 273      | 0  | 0  | 1  | 1         |
| 20   | -85.70074 | 33.56059 | 425      | 1  | 0  | 0  | 1         |
| 21   | -87.38140 | 34.29811 | 279      | 0  | 0  | 1  | 1         |
| 22   | -87.33273 | 34.41979 | 321      | 1  | 0  | 0  | 1         |
| 23   | -87.27680 | 34.17659 | 248      | 1  | 0  | 0  | 1         |
| 24   | -85.58357 | 34.45540 | 395      | 1  | 0  | 0  | 1         |
| 25   | -85.59611 | 34.55167 | 526      | 0  | 1  | 0  | 1         |
| 26   | -85.67106 | 34.35716 | 392      | 0  | 1  | 0  | 1         |
| 27   | -85.45730 | 33.96340 | 300      | 1  | 0  | 0  | 1         |
| 28   | -85.84679 | 34.14676 | 188      | 1  | 0  | 0  | 1         |
| 29   | -85.26428 | 34.12260 | 232      | 1  | 0  | 0  | 1         |
| 30   | -85.81731 | 33.46215 | 485      | 1  | 0  | 0  | 1         |
| 31   | -84.71650 | 34.15014 | 272      | 0  | 0  | 1  | 1         |
| 32   | -83.10755 | 34.86200 | 536      | 2  | 0  | 0  | 2         |
| 33   | -83.05563 | 35.01376 | 887      | 1  | 0  | 0  | 1         |
| 34   | -83.08929 | 34.94523 | 744      | 1  | 0  | 0  | 1         |
| 35   | -83.12841 | 34.80557 | 481      | 0  | 0  | 1  | 1         |
| 36   | -83.22783 | 34.72782 | 394      | 2  | 1  | 0  | 3         |
| 37   | -83.31242 | 34.77755 | 469      | 1  | 0  | 1  | 1         |
| 38   | -83.29258 | 33.72088 | 132      | 2  | 0  | 2  | 4         |
| 39   | -86.07201 | 33.20150 | 291      | 1  | 0  | 0  | 1         |
| 40   | -84.71137 | 34.87866 | 354      | 1  | 0  | 0  | 1         |
| 41   | -84.65486 | 34.93135 | 485      | 0  | 1  | 0  | 1         |
| 42   | -84.33880 | 34.77507 | 730      | 1  | 0  | 0  | 1         |
| 43   | -84.25093 | 34.68311 | 810      | 1  | 0  | 0  | 1         |
| 44   | -83.73265 | 34.74192 | 766      | 0  | 0  | 1  | 1         |
| 45   | -83.51849 | 35.65682 | 780      | 1  | 0  | 0  | 1         |
| 46   | -83.35717 | 35.70232 | 653      | 1  | 0  | 0  | 1         |

|     |           |          |      |   |   |   |   |
|-----|-----------|----------|------|---|---|---|---|
| 47  | -83.31077 | 35.52117 | 666  | 1 | 0 | 0 | 1 |
| 48  | -83.21343 | 35.77140 | 575  | 1 | 0 | 0 | 1 |
| 49  | -83.66993 | 35.61933 | 593  | 0 | 1 | 0 | 1 |
| 50  | -84.69140 | 34.75931 | 804  | 1 | 0 | 0 | 1 |
| 51  | -85.49764 | 33.91858 | 257  | 1 | 0 | 0 | 1 |
| 52  | -84.62477 | 35.10896 | 530  | 0 | 0 | 1 | 1 |
| 53  | -82.07211 | 36.31100 | 648  | 0 | 0 | 1 | 1 |
| 54  | -80.54509 | 37.34757 | 1121 | 1 | 0 | 0 | 1 |
| 55  | -78.78368 | 38.12902 | 814  | 1 | 0 | 0 | 1 |
| 56  | -78.64308 | 38.29123 | 761  | 1 | 0 | 0 | 1 |
| 57  | -78.18149 | 38.80508 | 755  | 1 | 0 | 0 | 1 |
| 58  | -78.34060 | 38.62592 | 1032 | 1 | 0 | 0 | 1 |
| 59  | -79.44785 | 38.07403 | 669  | 0 | 1 | 0 | 1 |
| 60  | -79.34980 | 38.04052 | 784  | 1 | 0 | 0 | 1 |
| 61  | -87.52677 | 35.39384 | 304  | 1 | 0 | 0 | 1 |
| 62  | -84.74478 | 36.12452 | 378  | 1 | 0 | 0 | 1 |
| 63  | -84.48829 | 36.13606 | 496  | 1 | 0 | 0 | 1 |
| 64  | -85.49971 | 34.84695 | 315  | 1 | 0 | 0 | 1 |
| 65  | -88.19299 | 34.60502 | 177  | 1 | 0 | 0 | 1 |
| 66  | -84.24760 | 35.34883 | 327  | 1 | 1 | 0 | 2 |
| 67  | -84.19383 | 35.34534 | 425  | 1 | 0 | 0 | 1 |
| 68  | -83.59187 | 35.32969 | 593  | 1 | 0 | 0 | 1 |
| 69  | -82.48742 | 35.59535 | 722  | 1 | 0 | 0 | 1 |
| 70  | -82.74536 | 36.70494 | 460  | 1 | 0 | 0 | 1 |
| 71  | -79.59341 | 37.44090 | 692  | 1 | 0 | 0 | 1 |
| 72  | -79.94446 | 37.21840 | 473  | 0 | 0 | 1 | 1 |
| 73  | -79.97707 | 37.98723 | 508  | 1 | 0 | 0 | 1 |
| 74  | -79.20190 | 38.60225 | 591  | 1 | 0 | 0 | 1 |
| 75  | -79.62846 | 38.00583 | 440  | 0 | 0 | 1 | 1 |
| 76  | -78.91022 | 38.89373 | 589  | 1 | 0 | 0 | 1 |
| 77  | -82.49056 | 38.81387 | 277  | 1 | 0 | 0 | 1 |
| 78  | -84.75872 | 36.01773 | 572  | 1 | 0 | 0 | 1 |
| 79  | -84.91430 | 36.05598 | 588  | 0 | 1 | 0 | 1 |
| 80  | -84.71430 | 36.47398 | 479  | 1 | 0 | 0 | 1 |
| 81  | -79.68214 | 37.47978 | 759  | 1 | 0 | 0 | 1 |
| 82  | -84.45749 | 36.84983 | 412  | 1 | 0 | 0 | 1 |
| 83  | -84.42480 | 36.91024 | 336  | 1 | 0 | 0 | 1 |
| 84  | -83.76402 | 36.10415 | 399  | 1 | 0 | 0 | 1 |
| 85  | -83.89043 | 36.37519 | 490  | 1 | 0 | 0 | 1 |
| 86  | -83.69725 | 36.60349 | 352  | 1 | 0 | 0 | 1 |
| 87  | -83.74413 | 36.72807 | 390  | 1 | 0 | 0 | 1 |
| 88  | -83.21425 | 36.92808 | 767  | 1 | 0 | 0 | 1 |
| 89  | -82.48692 | 36.49101 | 427  | 1 | 0 | 0 | 1 |
| 90  | -82.30345 | 37.28378 | 549  | 0 | 1 | 0 | 1 |
| 91  | -82.99386 | 37.24096 | 318  | 1 | 0 | 0 | 1 |
| 92  | -81.53171 | 36.88458 | 731  | 1 | 0 | 0 | 1 |
| 93  | -85.69242 | 33.57481 | 344  | 0 | 0 | 1 | 1 |
| 94  | -84.63633 | 33.76154 | 295  | 1 | 0 | 0 | 1 |
| 95  | -82.49127 | 35.60575 | 770  | 1 | 0 | 0 | 1 |
| 96  | -82.71758 | 35.44758 | 1205 | 1 | 0 | 0 | 1 |
| 97  | -82.58961 | 35.21877 | 809  | 1 | 0 | 0 | 1 |
| 98  | -84.24123 | 35.34314 | 413  | 1 | 0 | 0 | 1 |
| 99  | -84.11201 | 35.39665 | 553  | 1 | 0 | 0 | 1 |
| 100 | -84.33586 | 35.20793 | 513  | 1 | 0 | 0 | 1 |
| 101 | -84.45322 | 35.03918 | 614  | 0 | 0 | 1 | 1 |
| 102 | -84.60815 | 35.14822 | 588  | 1 | 0 | 0 | 1 |
| 103 | -80.06615 | 36.78941 | 386  | 1 | 0 | 0 | 1 |
| 104 | -85.12241 | 35.17524 | 231  | 0 | 0 | 1 | 1 |

|     |           |          |     |   |   |   |   |
|-----|-----------|----------|-----|---|---|---|---|
| 105 | -83.74414 | 34.38905 | 356 | 0 | 0 | 1 | 1 |
| 106 | -82.84724 | 35.85284 | 656 | 1 | 0 | 0 | 1 |
| 107 | -82.84973 | 36.08371 | 408 | 1 | 0 | 0 | 1 |
| 108 | -82.44664 | 36.10384 | 522 | 1 | 0 | 0 | 1 |
| 109 | -81.27322 | 36.12973 | 373 | 0 | 1 | 0 | 1 |
| 110 | -80.26266 | 36.39726 | 511 | 0 | 0 | 1 | 1 |
| 111 | -81.06851 | 36.37937 | 412 | 0 | 0 | 1 | 1 |
| 112 | -81.29543 | 35.20810 | 271 | 0 | 0 | 1 | 1 |
| 113 | -81.85325 | 34.87066 | 191 | 0 | 0 | 1 | 1 |
| 114 | -83.04584 | 34.49625 | 200 | 0 | 0 | 1 | 1 |
| 115 | -83.67732 | 37.77913 | 256 | 1 | 0 | 0 | 1 |
| 116 | -83.09057 | 37.75175 | 292 | 0 | 0 | 1 | 1 |
| 117 | -82.72829 | 37.71582 | 213 | 1 | 0 | 0 | 1 |
| 118 | -82.82529 | 38.05997 | 209 | 1 | 0 | 0 | 1 |
| 119 | -82.42619 | 38.30313 | 186 | 1 | 0 | 0 | 1 |
| 120 | -79.95090 | 36.43191 | 256 | 1 | 0 | 0 | 1 |
| 121 | -82.38316 | 38.02512 | 402 | 1 | 0 | 0 | 1 |
| 122 | -82.01469 | 37.88885 | 260 | 1 | 0 | 0 | 1 |
| 123 | -81.84275 | 38.18754 | 201 | 1 | 0 | 0 | 1 |
| 124 | -81.66953 | 38.26121 | 267 | 1 | 0 | 0 | 1 |
| 125 | -81.57557 | 38.65200 | 241 | 1 | 0 | 0 | 1 |
| 126 | -81.34470 | 38.77533 | 240 | 1 | 0 | 0 | 1 |
| 127 | -80.65887 | 38.63269 | 394 | 1 | 0 | 0 | 1 |
| 128 | -80.53176 | 38.82579 | 284 | 0 | 1 | 0 | 1 |
| 129 | -80.83122 | 37.50894 | 550 | 1 | 0 | 0 | 1 |
| 130 | -79.31298 | 36.78146 | 228 | 0 | 1 | 0 | 1 |
| 131 | -79.52662 | 37.07664 | 309 | 0 | 0 | 1 | 1 |
| 132 | -79.60274 | 37.09430 | 282 | 0 | 1 | 0 | 1 |
