# Supplementary material for: Ecological Drivers of Species Distributions and Niche Overlap for three Eastern Subterranean Termite Species in the Southern Appalachian Mountains, USA
Source: Preprints.org preprint supplement (doi:10.20944/preprints201812.0178.v1), 2018-12-17
Supplement: Supplementary file 4 [file supplementary]

**Table S2.** Pairwise niche overlap among *Reticulitermes* species for each of four environmental factors. The top three rows show Schoener's D statistic, and the bottom three rows show the modified Hellinger statistic, I. The four environmental factors are: temperature range (TR), dry-season precipitation (DP), summer temperature (ST), and wet-season precipitation (WP). Niche overlap is highest in green and lowest in red. *R. flavipes*, *R. mallei*, and *R. virginicus* are abbreviated as Rf, Rm, and Rv, respectively.

|          |              | TR    | DP    | ST    | WP    |
|----------|--------------|-------|-------|-------|-------|
| <b>D</b> | <i>Rf/Rm</i> | 0.889 | 0.872 | 0.693 | 0.820 |
|          | <i>Rf/Rv</i> | 0.683 | 0.707 | 0.680 | 0.680 |
|          | <i>Rm/Rv</i> | 0.791 | 0.809 | 0.894 | 0.848 |
| <b>I</b> | <i>Rf/Rm</i> | 0.991 | 0.990 | 0.919 | 0.982 |
|          | <i>Rf/Rv</i> | 0.917 | 0.928 | 0.926 | 0.942 |
|          | <i>Rm/Rv</i> | 0.952 | 0.961 | 0.990 | 0.984 |
